# Supplementary material for: Changes in the Expression of Myosins During Postnatal Development of Masseter Muscle in the Microphthalmic Mouse
Source: PubMed Central journal article supplement — Open Dent J. 2010 Feb 8;4:1–7. doi: 10.2174/1874210601004010001 (PMC2835863; doi:10.2174/1874210601004010001), 2010-02-08
Supplement: TODENTJ-4-1_SD1.pdf [file TODENTJ-4-1_SD1.pdf]

Supplementary Material Table 1

|          | <b>Powder Diet<br/>mean±SD</b> | <b>n</b> | <b>Pellet Diet<br/>mean±SD</b> | <b>n</b> | <b>Significance</b> |
|----------|--------------------------------|----------|--------------------------------|----------|---------------------|
| MyHC I   | 0.00211±0.00122                | 6        | 0.00102±0.000509               | 6        | ns                  |
| MyHC IIa | 0.442±0.418                    | 6        | 0.524±0.394                    | 6        | ns                  |
| MyHC IIx | 0.0857±0.0501                  | 6        | 0.0423±0.0177                  | 6        | ns                  |
| MyHC IIb | 4.38±2.75                      | 6        | 2.39±2.87                      | 6        | ns                  |

n: the number of samples.
